# Supplementary material for: BMAL1 modulates senescence programming via AP-1
Source: Aging (Albany NY). 2023 Oct 10;15(19):9984–10009. doi: 10.18632/aging.205112 (PMC10599731; doi:10.18632/aging.205112)
Supplement: Supplementary Figures [file aging-15-205112-s001.pdf]

## SUPPLEMENTARY FIGURES

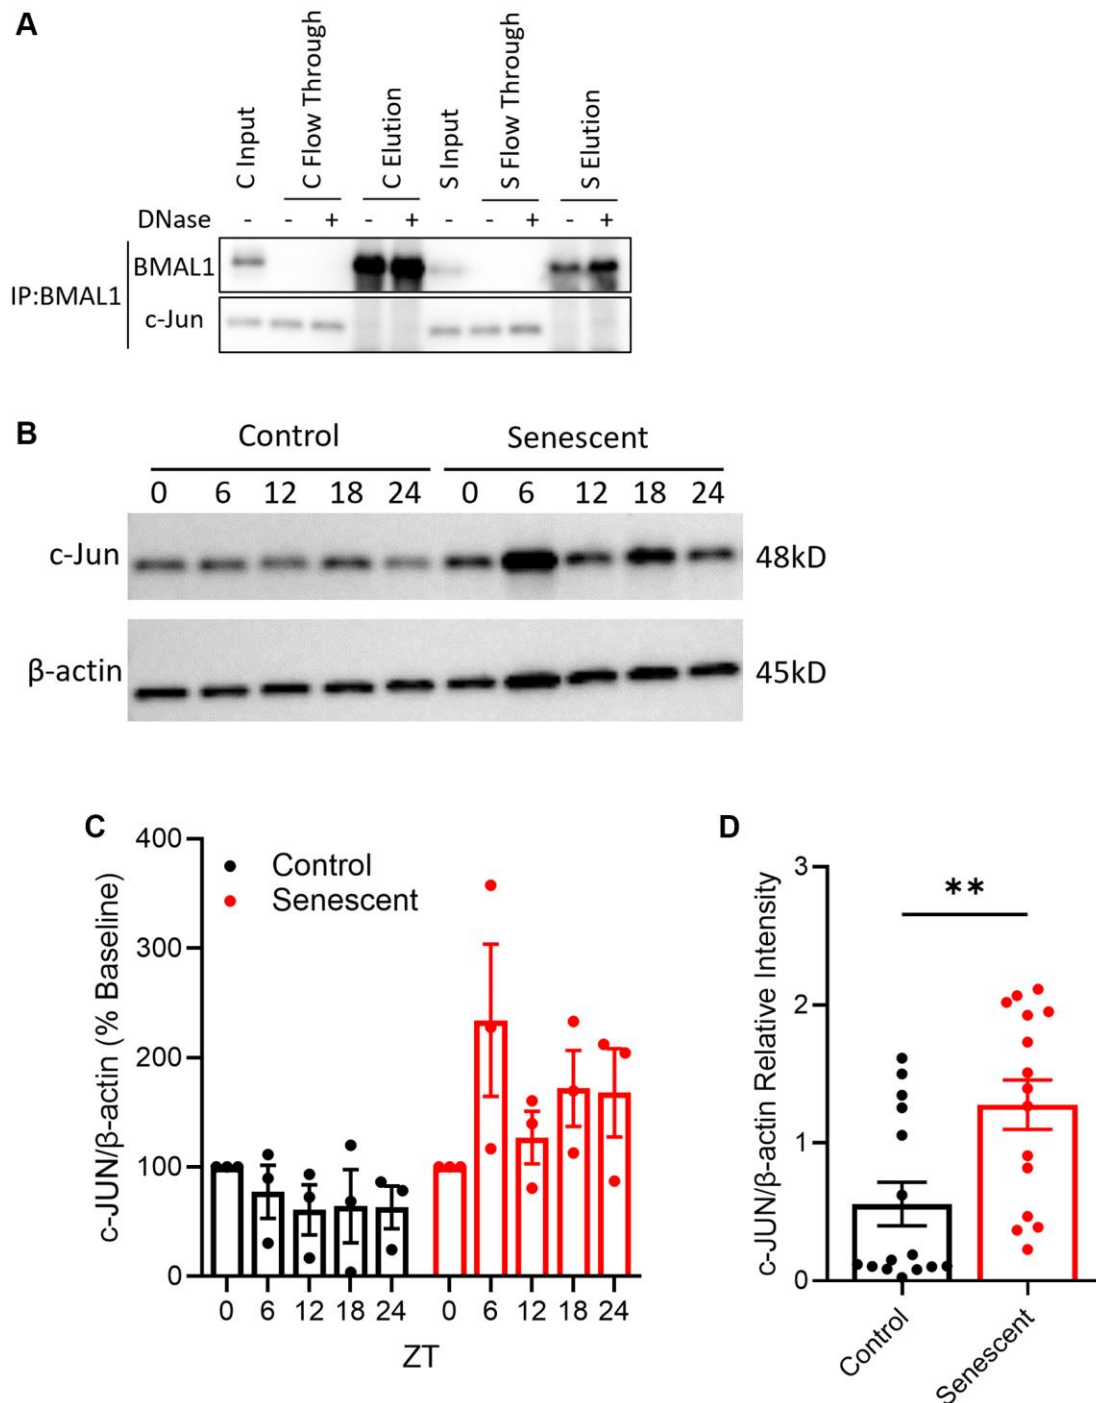

**Supplementary Figure 1. BMAL1 is not directly bound and does not impart rhythmicity on c-Jun protein.** (A) Representative BMAL1 co-immunoprecipitation in control and senescent WT cells, collected 12 hours post-synchronization, with or without DNase digestion. "Input" refers to 1/20 volume of input, "Flow Through" refers to 1/20 volume of flow through after binding of samples with BMAL1 antibody conjugated beads, "Elution" refers to 1/5 volume of final elution from beads. (B–D) Representative western blot (B) and quantification (C) of c-Jun in control and senescent cells, and relative intensity of all time points from each treatment group (D) normalized to  $\beta$ -actin. Data is presented with mean  $\pm$  SEM; one-way ANOVA tests with Dunnett's post hoc test for multiple comparisons (C) and two-tailed unpaired Student's *t*-test (D) were used with significance indicated as \**P* < 0.05, \*\**P* < 0.01, \*\*\**P* < 0.001, \*\*\*\**P* < 0.0001; *n* = 2 replicates for BMAL1 co-IP; *n* = 3 replicates for c-Jun WB.

**A**

| Motif (↑ChIP-seq, ↓RNA-seq)                                                         | % of Targets | P-value | Log P-value | Mapped |
|-------------------------------------------------------------------------------------|--------------|---------|-------------|--------|
| 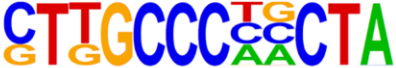 † | 33.33%       | 1e-8    | -1.913e+01  | HIC2   |
| 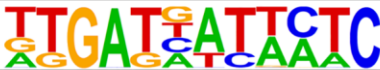 † | 55.56%       | 1e-7    | -1.667e+01  | GATA   |

**B**

| Motif (↓ChIP-seq, ↑RNA-seq)                                                         | % of Targets | P-value | Log P-value | Mapped |
|-------------------------------------------------------------------------------------|--------------|---------|-------------|--------|
| 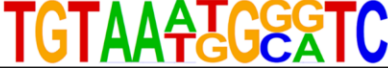 † | 23.08%       | 1e-7    | -1.798e+01  | BSX    |
| 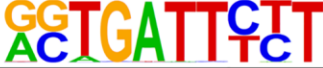 † | 46.15%       | 1e-6    | -1.603e+01  | GFI1   |

† Possible false positive

**Supplementary Figure 2. BMAL1 binding is not inversely correlated with transcription. Related to Figure 3.** (A, B) Top motifs enriched in senescent cells with decreased gene expression (A) and enriched in control cells with decreased gene expression (B).  $n = 3$  replicates for BMAL1-ChIP-seq. False positives indicated with red†.

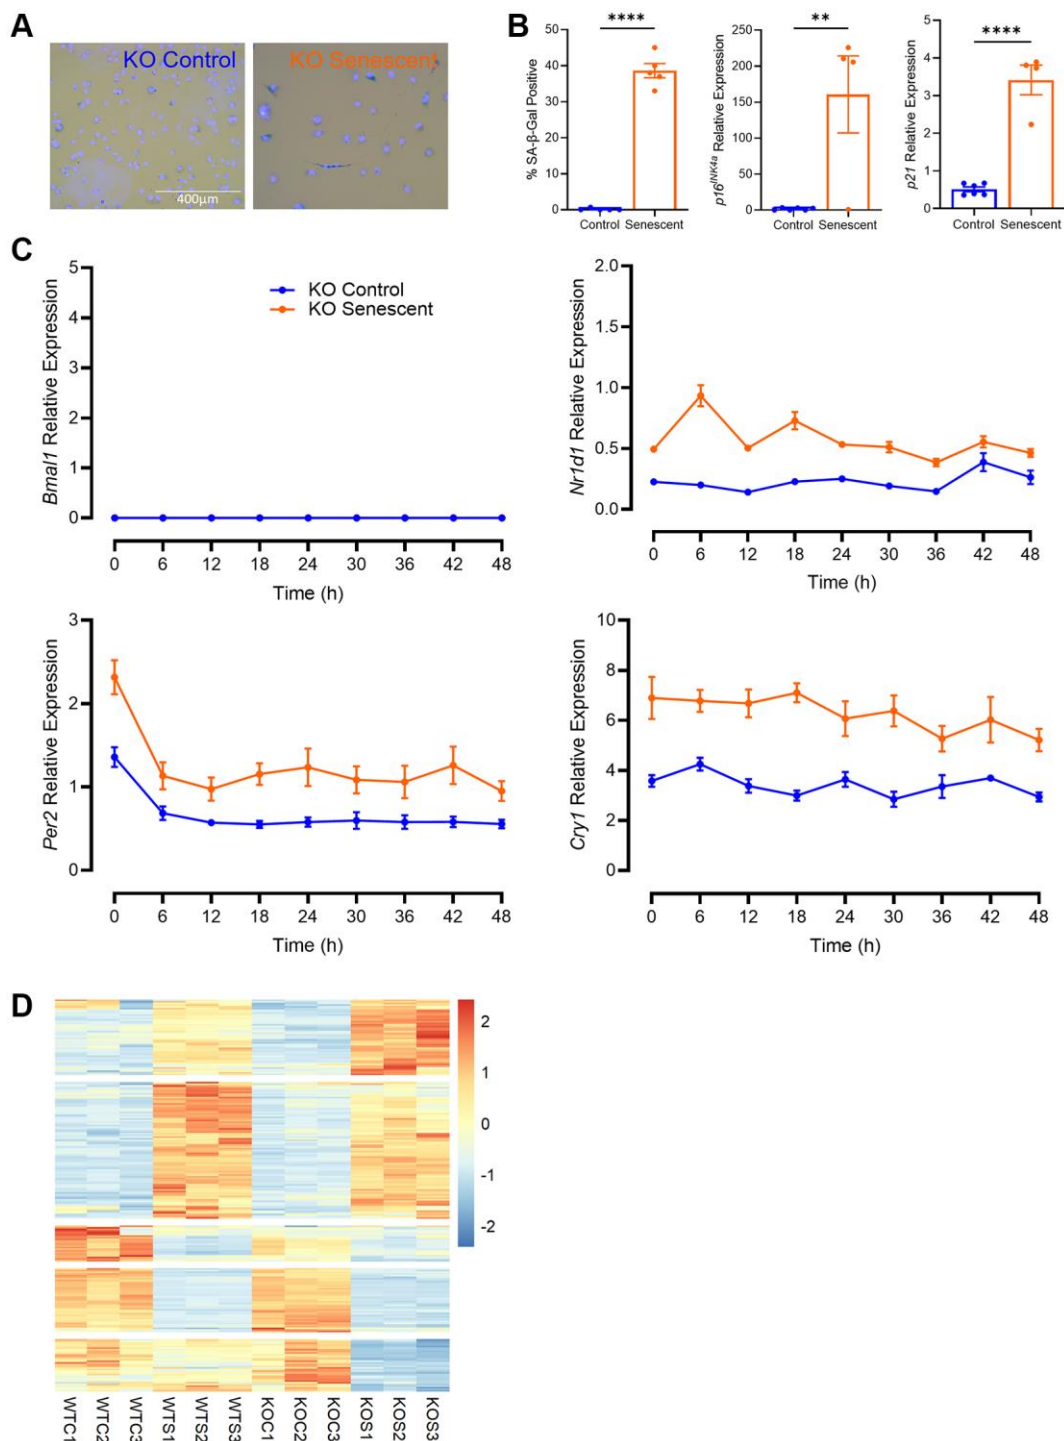

**Supplementary Figure 3. BMAL1 deficient cells exhibit key senescence markers and are arrhythmic.** (A, B) SA-β-gal staining and qPCR for CDKIs *p16<sup>INK4a</sup>* and *p21* in cells isolated from *Bmal1*<sup>-/-</sup> mice. (C) Expression of core circadian clock gene *Bmal1*, *Nr1d1*, *Per2*, and *Cry1* in control and senescent cells. (D) Heatmap of all DEGs which are also AP-1 target genes. Data is presented with mean  $\pm$  SEM; two-tailed unpaired Student's *t*-test (B) were used with significance indicated as \**P* < 0.05, \*\**P* < 0.01, \*\*\**P* < 0.001, \*\*\*\**P* < 0.0001. *n* = 4 replicates for senescent qPCR, *n* = 6 for control qPCR, *n* = 3 replicates for RNA-seq. Scale bar in (A) is 400  $\mu$ m.
