# Supplementary material for: BMAL1 modulates senescence programming via AP-1
Source: publisher site journal article supplement (doi:10.18632/aging.205112), 2023-10-10
Supplement: Supplementary file [file aging-v15i19-205112-supplementary-material-SD2.pdf]

## SUPPLEMENTARY TABLE

**Supplementary Table 1. Key Resources Table.**

| Reagent or Resource                                   | Source                      | Identifier              |
|-------------------------------------------------------|-----------------------------|-------------------------|
| <b>Primers</b>                                        |                             |                         |
| Tbp                                                   | Integrated DNA Technologies | Cat# MM.PT.39a.22214839 |
| Bmal1                                                 | Integrated DNA Technologies | Cat# Mm.PT.58.11121936  |
| Cry1                                                  | Integrated DNA Technologies | Cat# Mm.PT58.6237142    |
| Nr1d1                                                 | Integrated DNA Technologies | Cat# Mm.PT.58.17472803  |
| p16INK4a                                              | Integrated DNA Technologies | Cat# MM.PT.58.42804808  |
| p21                                                   | Integrated DNA Technologies | Cat# MM.PT.58.5884610   |
| Per2                                                  | Integrated DNA Technologies | Cat# Mm.PT58.5594166    |
| <b>Antibodies</b>                                     |                             |                         |
| Rabbit anti-BMAL1                                     | Cell Signalling             | Cat# 14020 (1:1,000)    |
| Rabbit anti- $\beta$ -actin                           | Cell Signalling             | Cat# 8457 (1:2,000)     |
| Rabbit anti-c-Jun                                     | Cell Signalling             | Cat3 9165 (1:1,000)     |
| Mouse anti-rabbit IgG-HRP                             | Santa Cruz                  | Cat# sc-2357 (1:20,000) |
| Rabbit anti-BMAL1                                     | Abcam                       | Cat# ab3350             |
| <b>Chemicals, peptides, and recombinant proteins</b>  |                             |                         |
| ABT-263 (navitoclax)                                  | APExBIO                     | Cat# A3007              |
| Cell lysis buffer                                     | Cell Signalling             | Cat# 9803               |
| Collagenase Type 2                                    | Worthington Biochemical     | Cat# LS004176           |
| Dexamethasone                                         | Sigma                       | Cat# D1756              |
| DMEM                                                  | Gibco                       | Cat# 11995-065          |
| HEPES Buffer                                          | Gibco                       | Cat# 15630-080          |
| M-MLV Reverse Transcriptase                           | Invitrogen                  | Cat# 28025013           |
| Penicillin-streptavidin-glutamine                     | Gibco                       | Cat# 10378-016          |
| Protease inhibitor cocktail                           | Sigma                       | Cat# P8340              |
| Protein A+G Magnetic Beads                            | Millipore                   | Cat# 16-663             |
| PVDF membrane                                         | Bio-Rad                     | Cat# 1620177            |
| SuperSignal West Pico PLUS Chemiluminescent Substrate | Thermo Fisher Scientific    | Cat# 34577              |
| TRIZOL reagent                                        | Invitrogen                  | Cat# 15596026           |
| TURBO™ DNase                                          | Thermo Fisher Scientific    | Cat# AM2238             |
| 0.05% Trypsin                                         | Gibco                       | Cat# 25300054           |
| <b>Critical commercial assays</b>                     |                             |                         |
| DC protein assay                                      | Bio-Rad                     | Cat# 5000116            |
| Dynabeads™ Protein G Immunoprecipitation Kit          | Thermo Fisher Scientific    | Cat# 10007D             |
| Min-Elute PCR purification kit                        | Qiagen                      | Cat# 28004              |
| NEBNext Ultra II RNA Library Prep for Illumina        | NEB                         | Cat# E7765              |
| Nextera DNA Sample Preparation Kit                    | Illumina                    | Cat# FC-121-1030        |
| NovaSeq 6000 SP Reagent Kit v1.5 (200 cycles)         | Illumina                    | Cat# 20040719           |
| NovaSeq XP 2-Lane Kit v1.5                            | Illumina                    | Cat# 20043130           |
| <u>TruSeq Stranded mRNA Sample Prep Kit</u>           | Illumina                    | Cat# 20020595           |

|                                                                  |                   |                                                                                                                                                                                                                                                       |
|------------------------------------------------------------------|-------------------|-------------------------------------------------------------------------------------------------------------------------------------------------------------------------------------------------------------------------------------------------------|
| Deposited data                                                   |                   |                                                                                                                                                                                                                                                       |
| BMAL1-ChIP-seq                                                   | GEO database      | GEO: GSE229009                                                                                                                                                                                                                                        |
| RNA-seq (Ctrl and Senescent WT)                                  | GEO database      | GEO: GSE229010                                                                                                                                                                                                                                        |
| RNA-seq (Ctrl and Senescent WT and <i>Bmal1</i> <sup>-/-</sup> ) | GEO database      | GEO: GSE229011                                                                                                                                                                                                                                        |
| Experimental models: Cell lines                                  |                   |                                                                                                                                                                                                                                                       |
| C57BL/6 WT MAFs                                                  | In house          | NA                                                                                                                                                                                                                                                    |
| <i>Bmal1</i> <sup>-/-</sup> MAFs                                 | In house          | NA                                                                                                                                                                                                                                                    |
| Software and algorithms                                          |                   |                                                                                                                                                                                                                                                       |
| Prism v9.4.1                                                     | GraphPad          | <a href="https://www.graphpad.com/scientific-software/prism/">https://www.graphpad.com/scientific-software/prism/</a>                                                                                                                                 |
| ImageJ                                                           | ImageJ            | <a href="https://imagej.nih.gov/ij/">https://imagej.nih.gov/ij/</a>                                                                                                                                                                                   |
| iBright Analysis v5.1.0                                          | Thermo Scientific | <a href="https://www.thermofisher.com/us/en/home/technical-resources/software-downloads/ibright-western-imager.html">https://www.thermofisher.com/us/en/home/technical-resources/software-downloads/ibright-western-imager.html</a>                   |
| Incucyte Base Analysis v2022A                                    | Sartorius         | <a href="https://www.sartorius.com/en/products/live-cell-imaging-analysis/live-cell-analysis-software/incucyte-base-software">https://www.sartorius.com/en/products/live-cell-imaging-analysis/live-cell-analysis-software/incucyte-base-software</a> |
| GSEA v4.3.2                                                      | Broad Institute   | <a href="https://www.gsea-msigdb.org/gsea/index.jsp">https://www.gsea-msigdb.org/gsea/index.jsp</a>                                                                                                                                                   |
| Factoextra v1.0.7                                                | CRAN              | <a href="https://cran.r-project.org/web/packages/factoextra/index.html">https://cran.r-project.org/web/packages/factoextra/index.html</a>                                                                                                             |
| Pheatmap v1.0.12                                                 | CRAN              | <a href="https://cran.r-project.org/web/packages/pheatmap/pheatmap.pdf">https://cran.r-project.org/web/packages/pheatmap/pheatmap.pdf</a>                                                                                                             |
| edgeR v3.36.0                                                    | [48]              |                                                                                                                                                                                                                                                       |
| Trimmomatic v.0.36                                               | [42]              |                                                                                                                                                                                                                                                       |
| STAR aligner                                                     | [43]              |                                                                                                                                                                                                                                                       |
| Subread v.1.5.2                                                  | [44]              |                                                                                                                                                                                                                                                       |
| DESeq2                                                           | [45]              |                                                                                                                                                                                                                                                       |
| GeneSCF v.1.1-p2                                                 | [46]              |                                                                                                                                                                                                                                                       |
| MAPRSeq pipeline v3.1.4                                          | [47]              |                                                                                                                                                                                                                                                       |
| HiChIP pipeline                                                  | [49]              |                                                                                                                                                                                                                                                       |
| Burrows-Wheeler Aligner v0.5.9                                   | [50]              |                                                                                                                                                                                                                                                       |
| Picard MarkDuplicates v1.67                                      | [51]              |                                                                                                                                                                                                                                                       |
| Model-Based Analysis of ChIP-seq                                 | [52]              |                                                                                                                                                                                                                                                       |
| Bedtools v2.16.2                                                 | [53]              |                                                                                                                                                                                                                                                       |
| Diffbind v2.14.0                                                 | [54]              |                                                                                                                                                                                                                                                       |
| MetaCycle v1.2.0                                                 | [33]              |                                                                                                                                                                                                                                                       |
